# Supplementary material for: Tg737 signaling is required for hypoxia-enhanced invasion and migration of hepatoma cells
Source: PubMed Central journal article supplement (PMC3523075; doi:10.1186/1756-9966-31-75), 2012-09-13

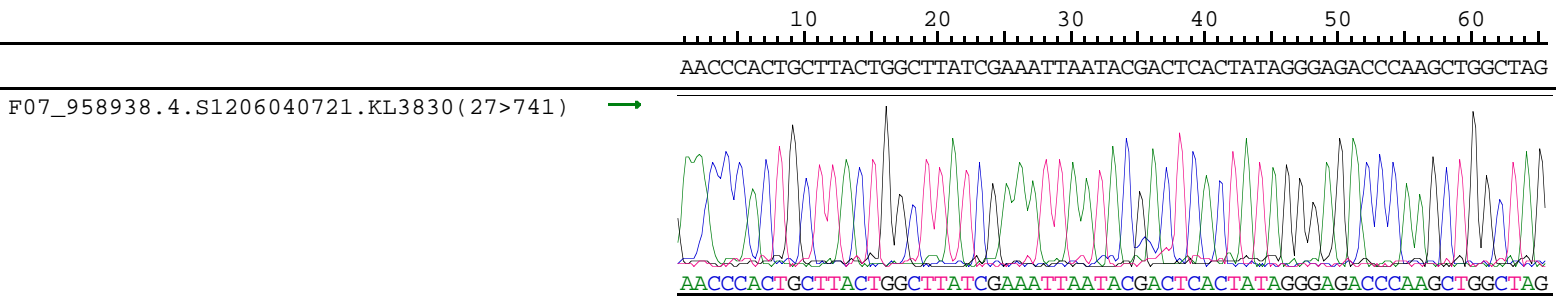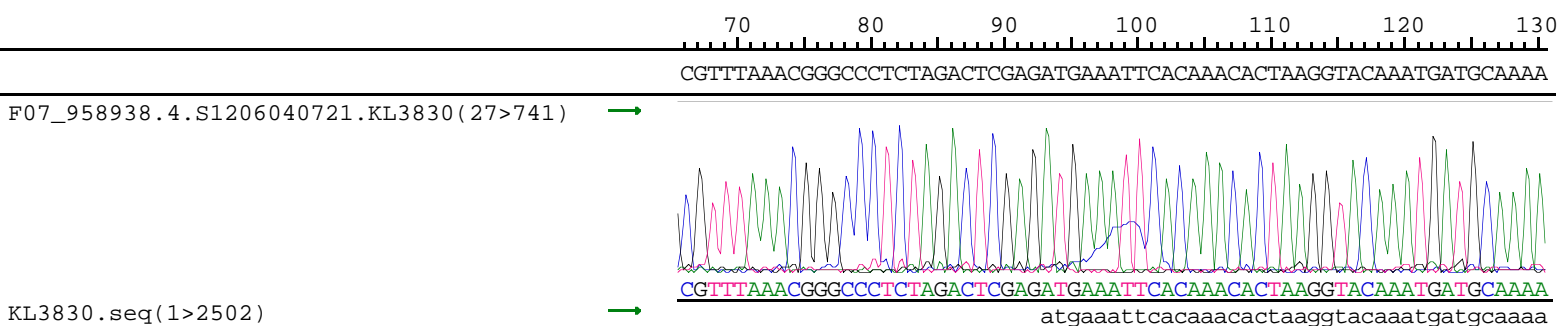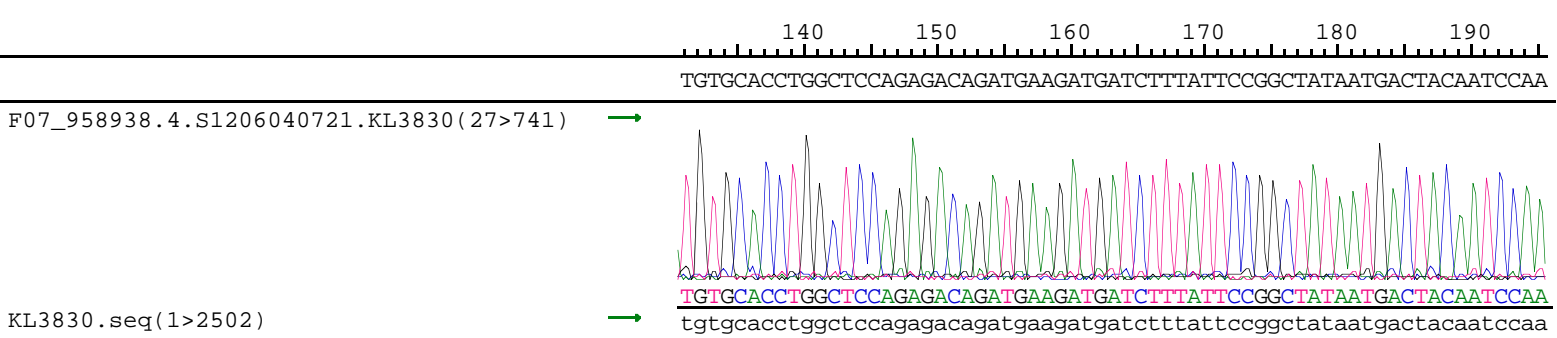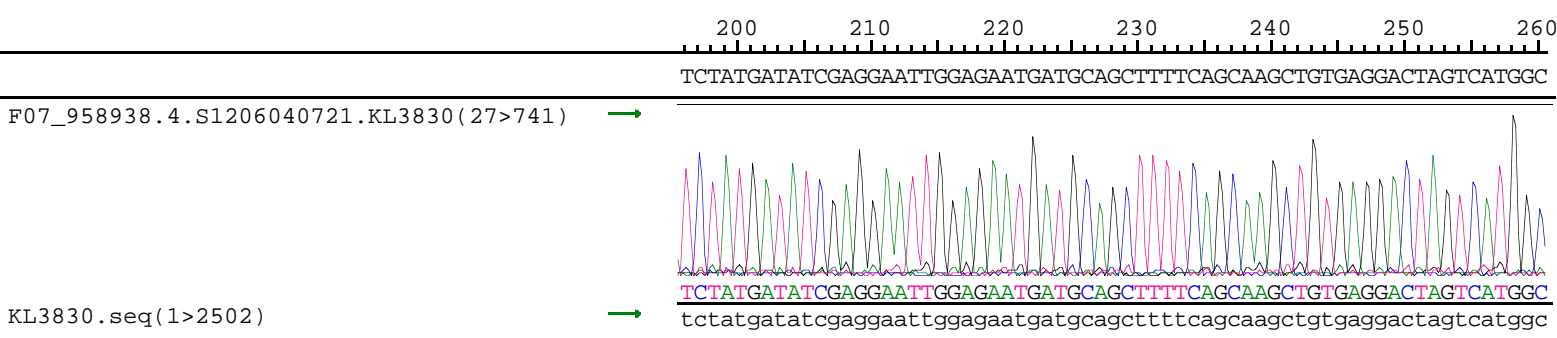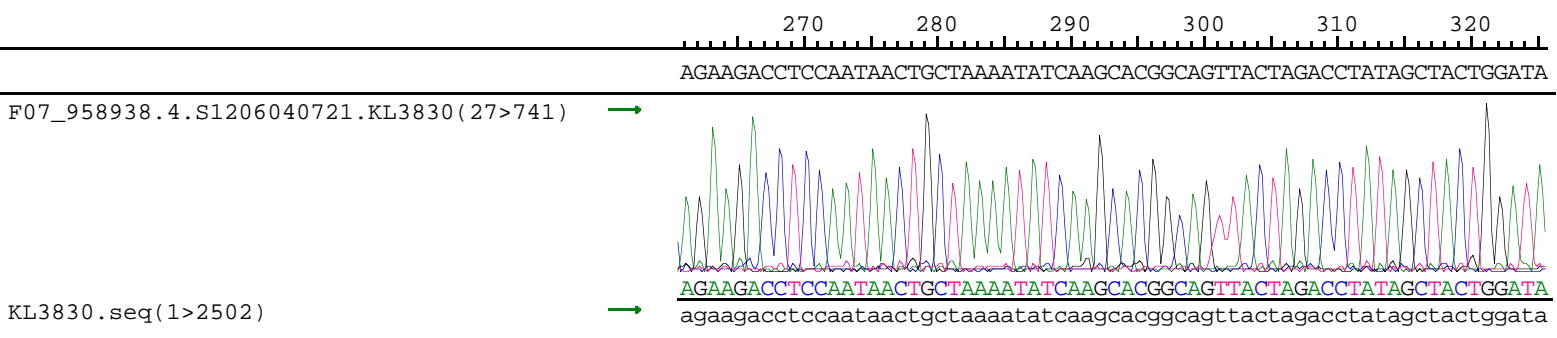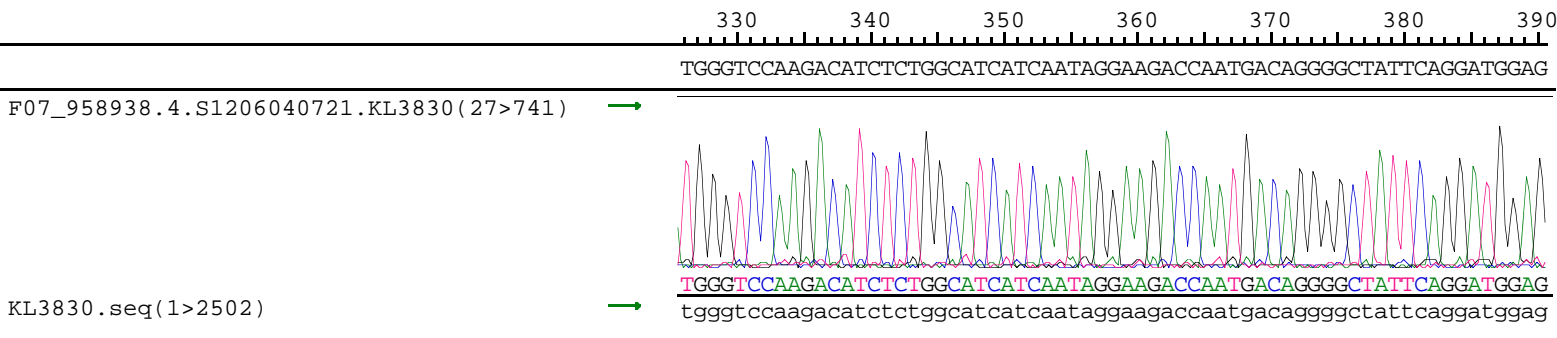

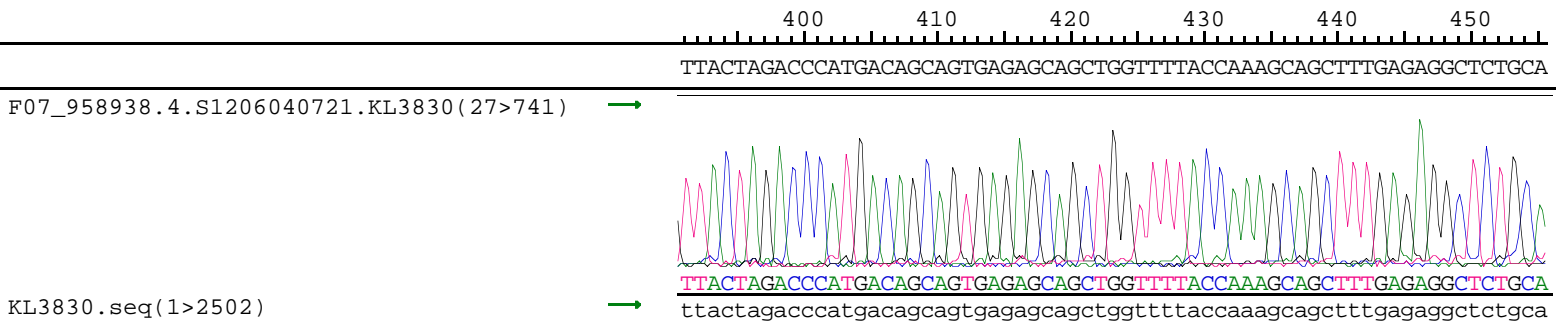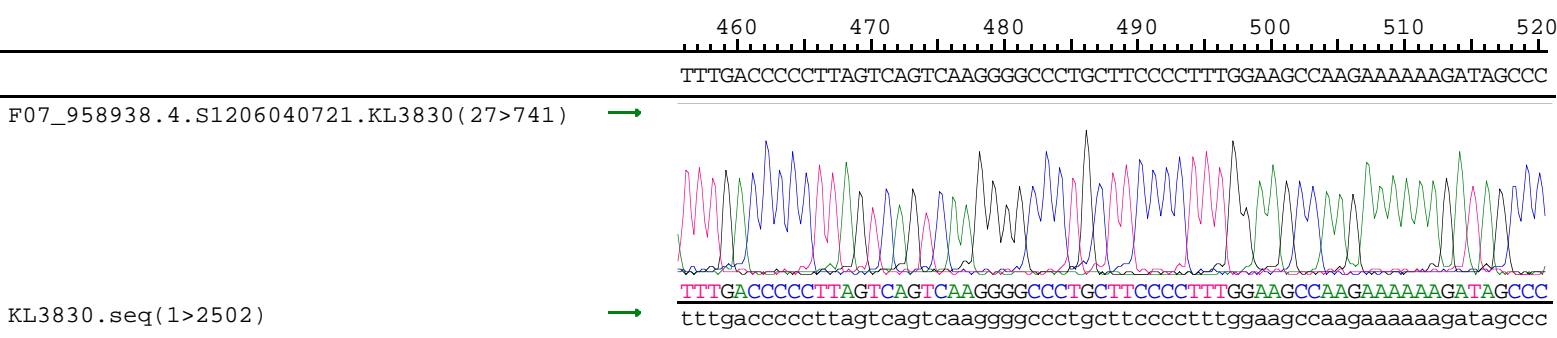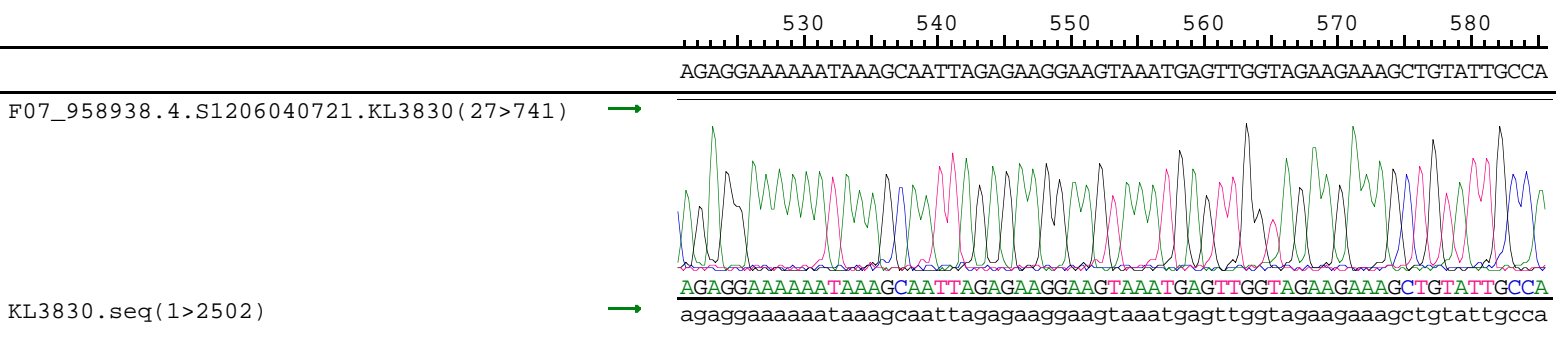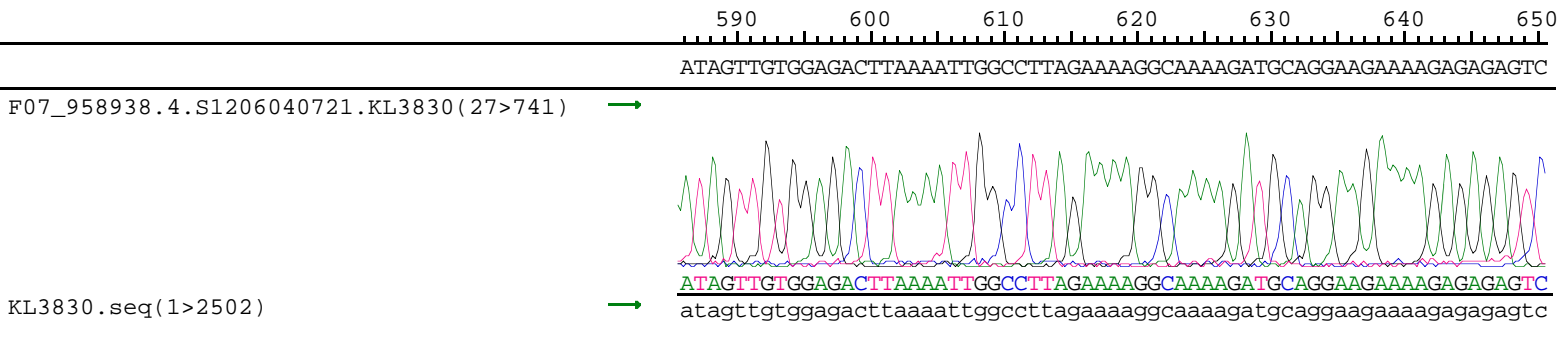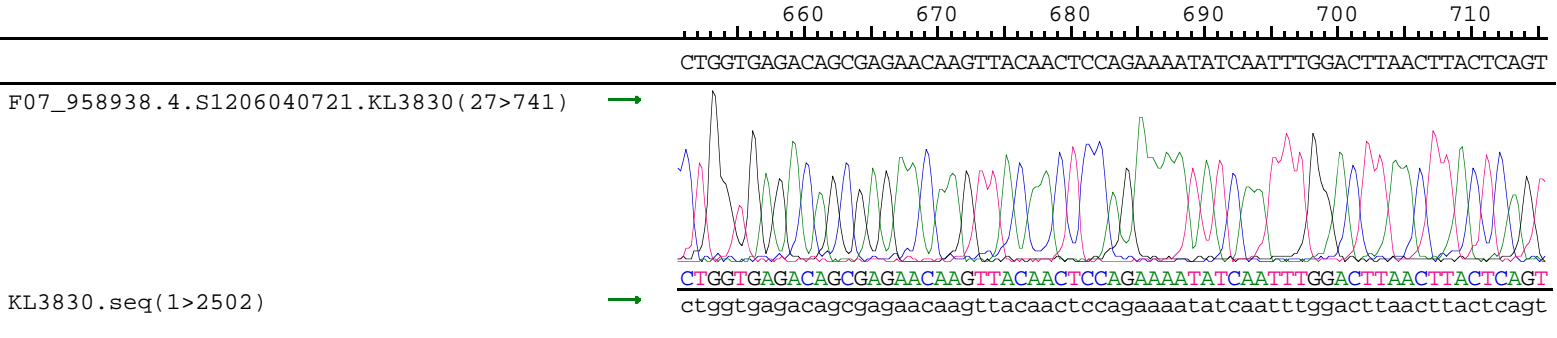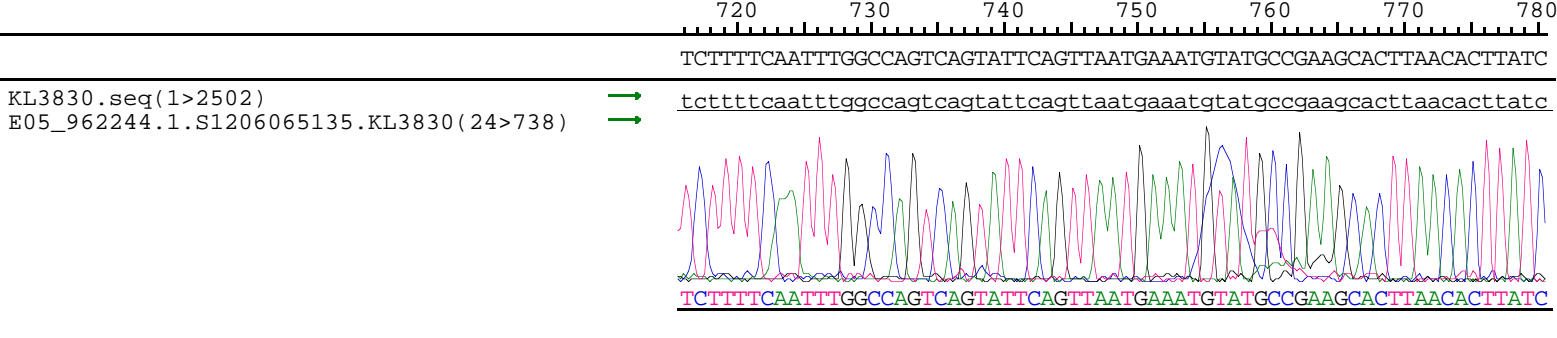

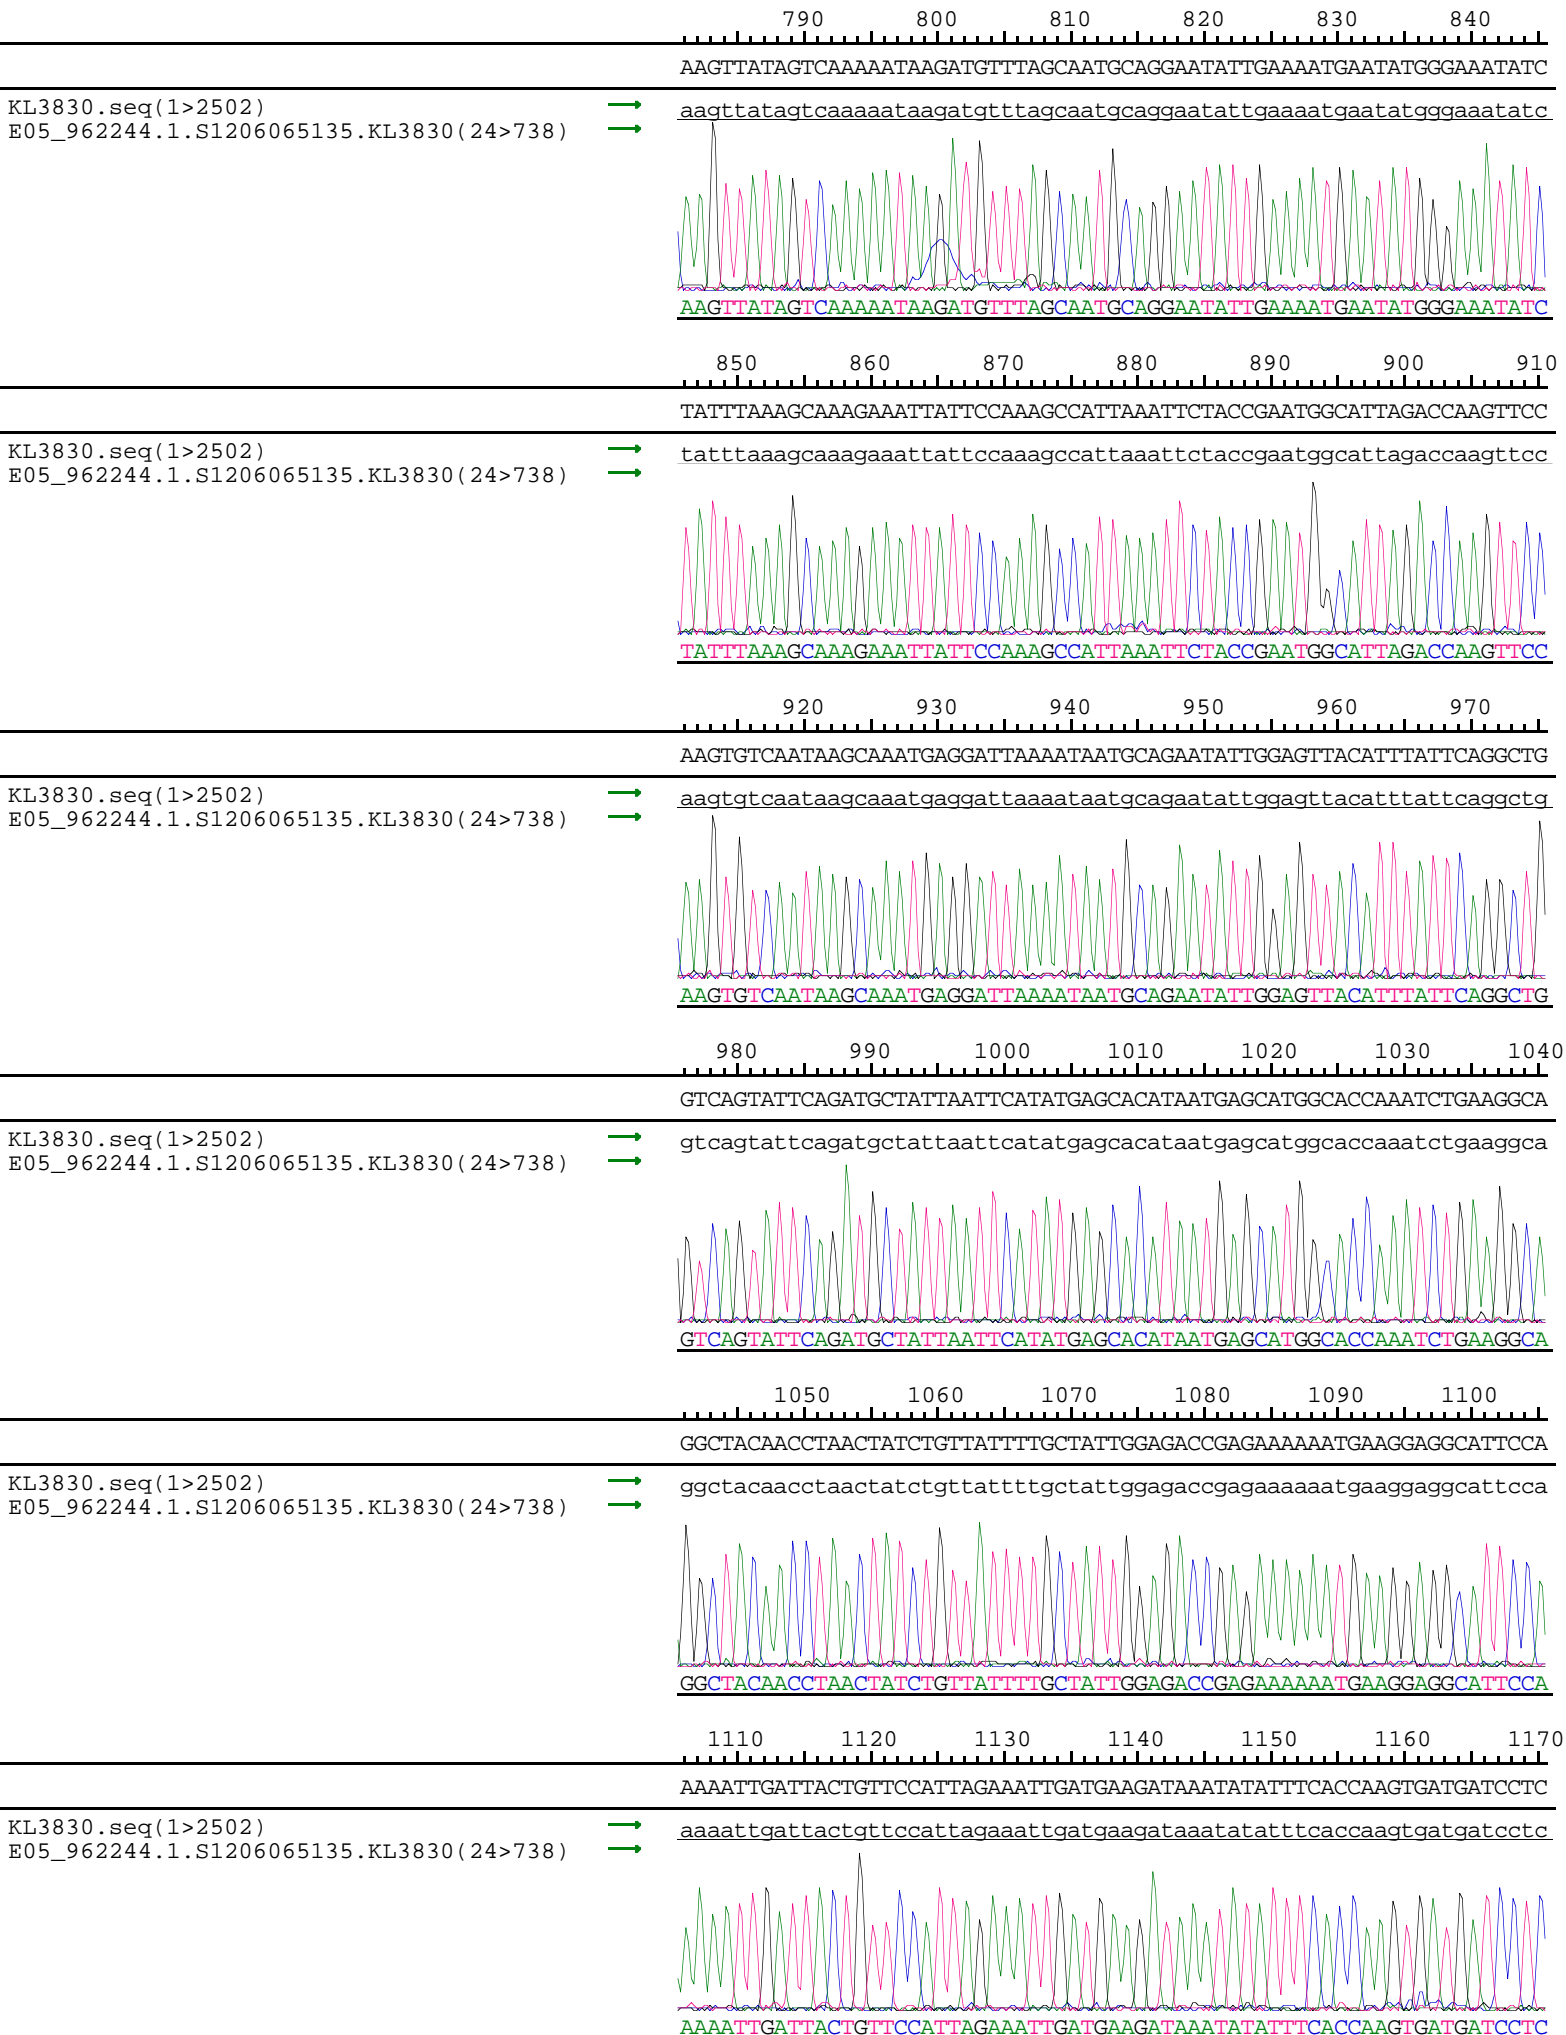

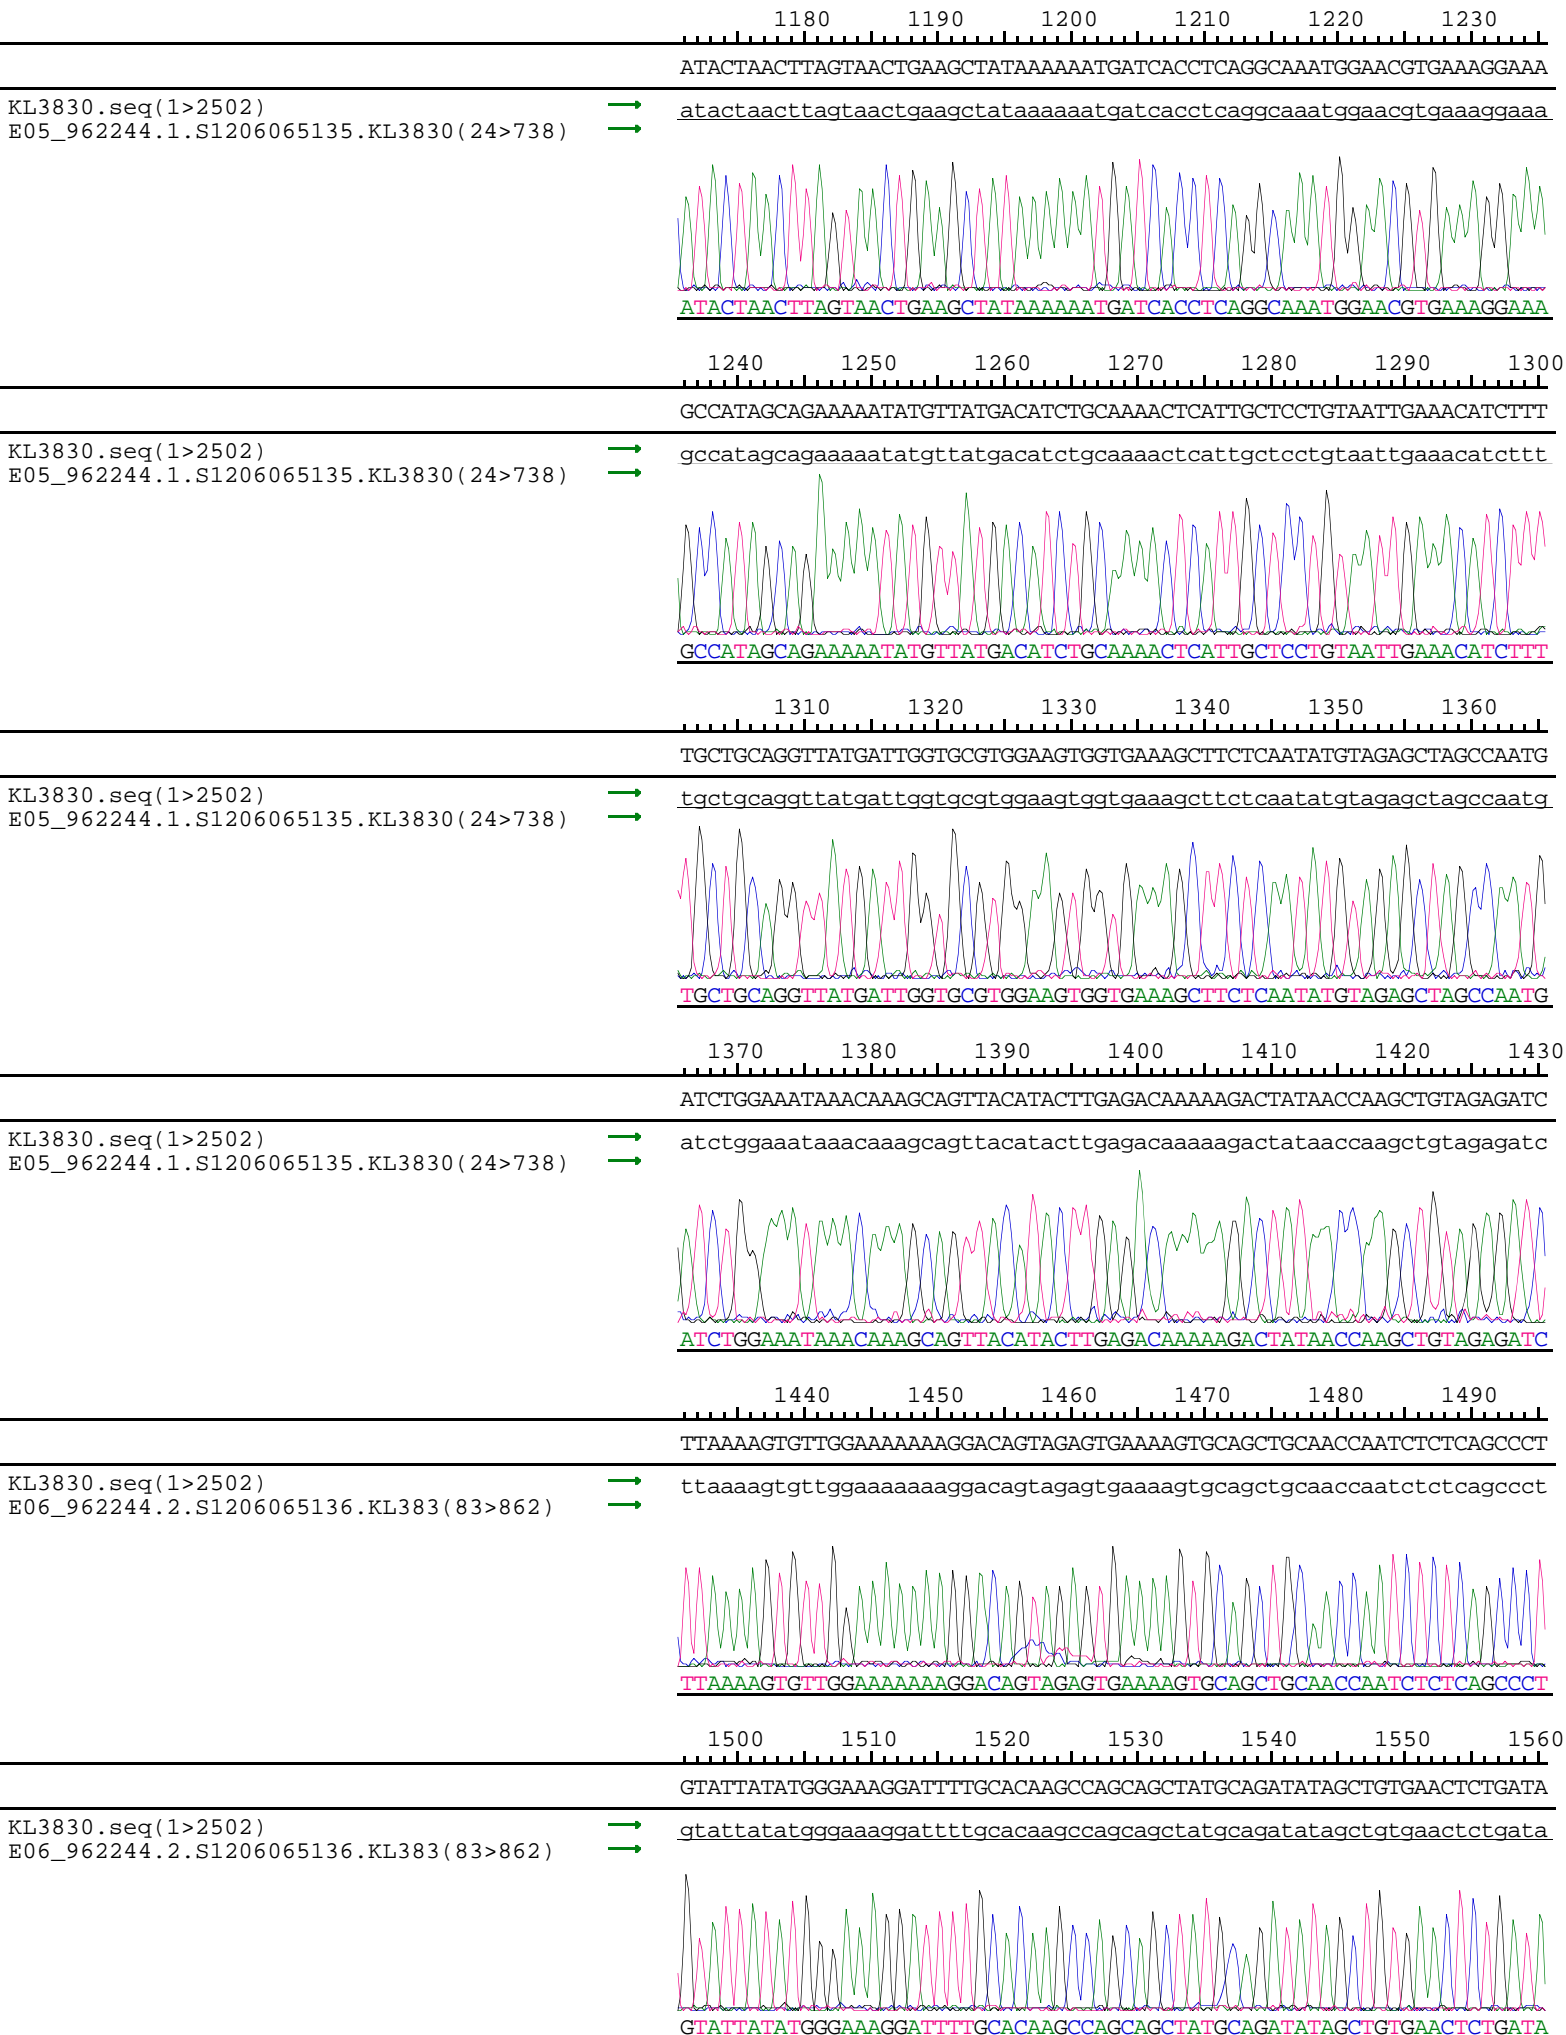

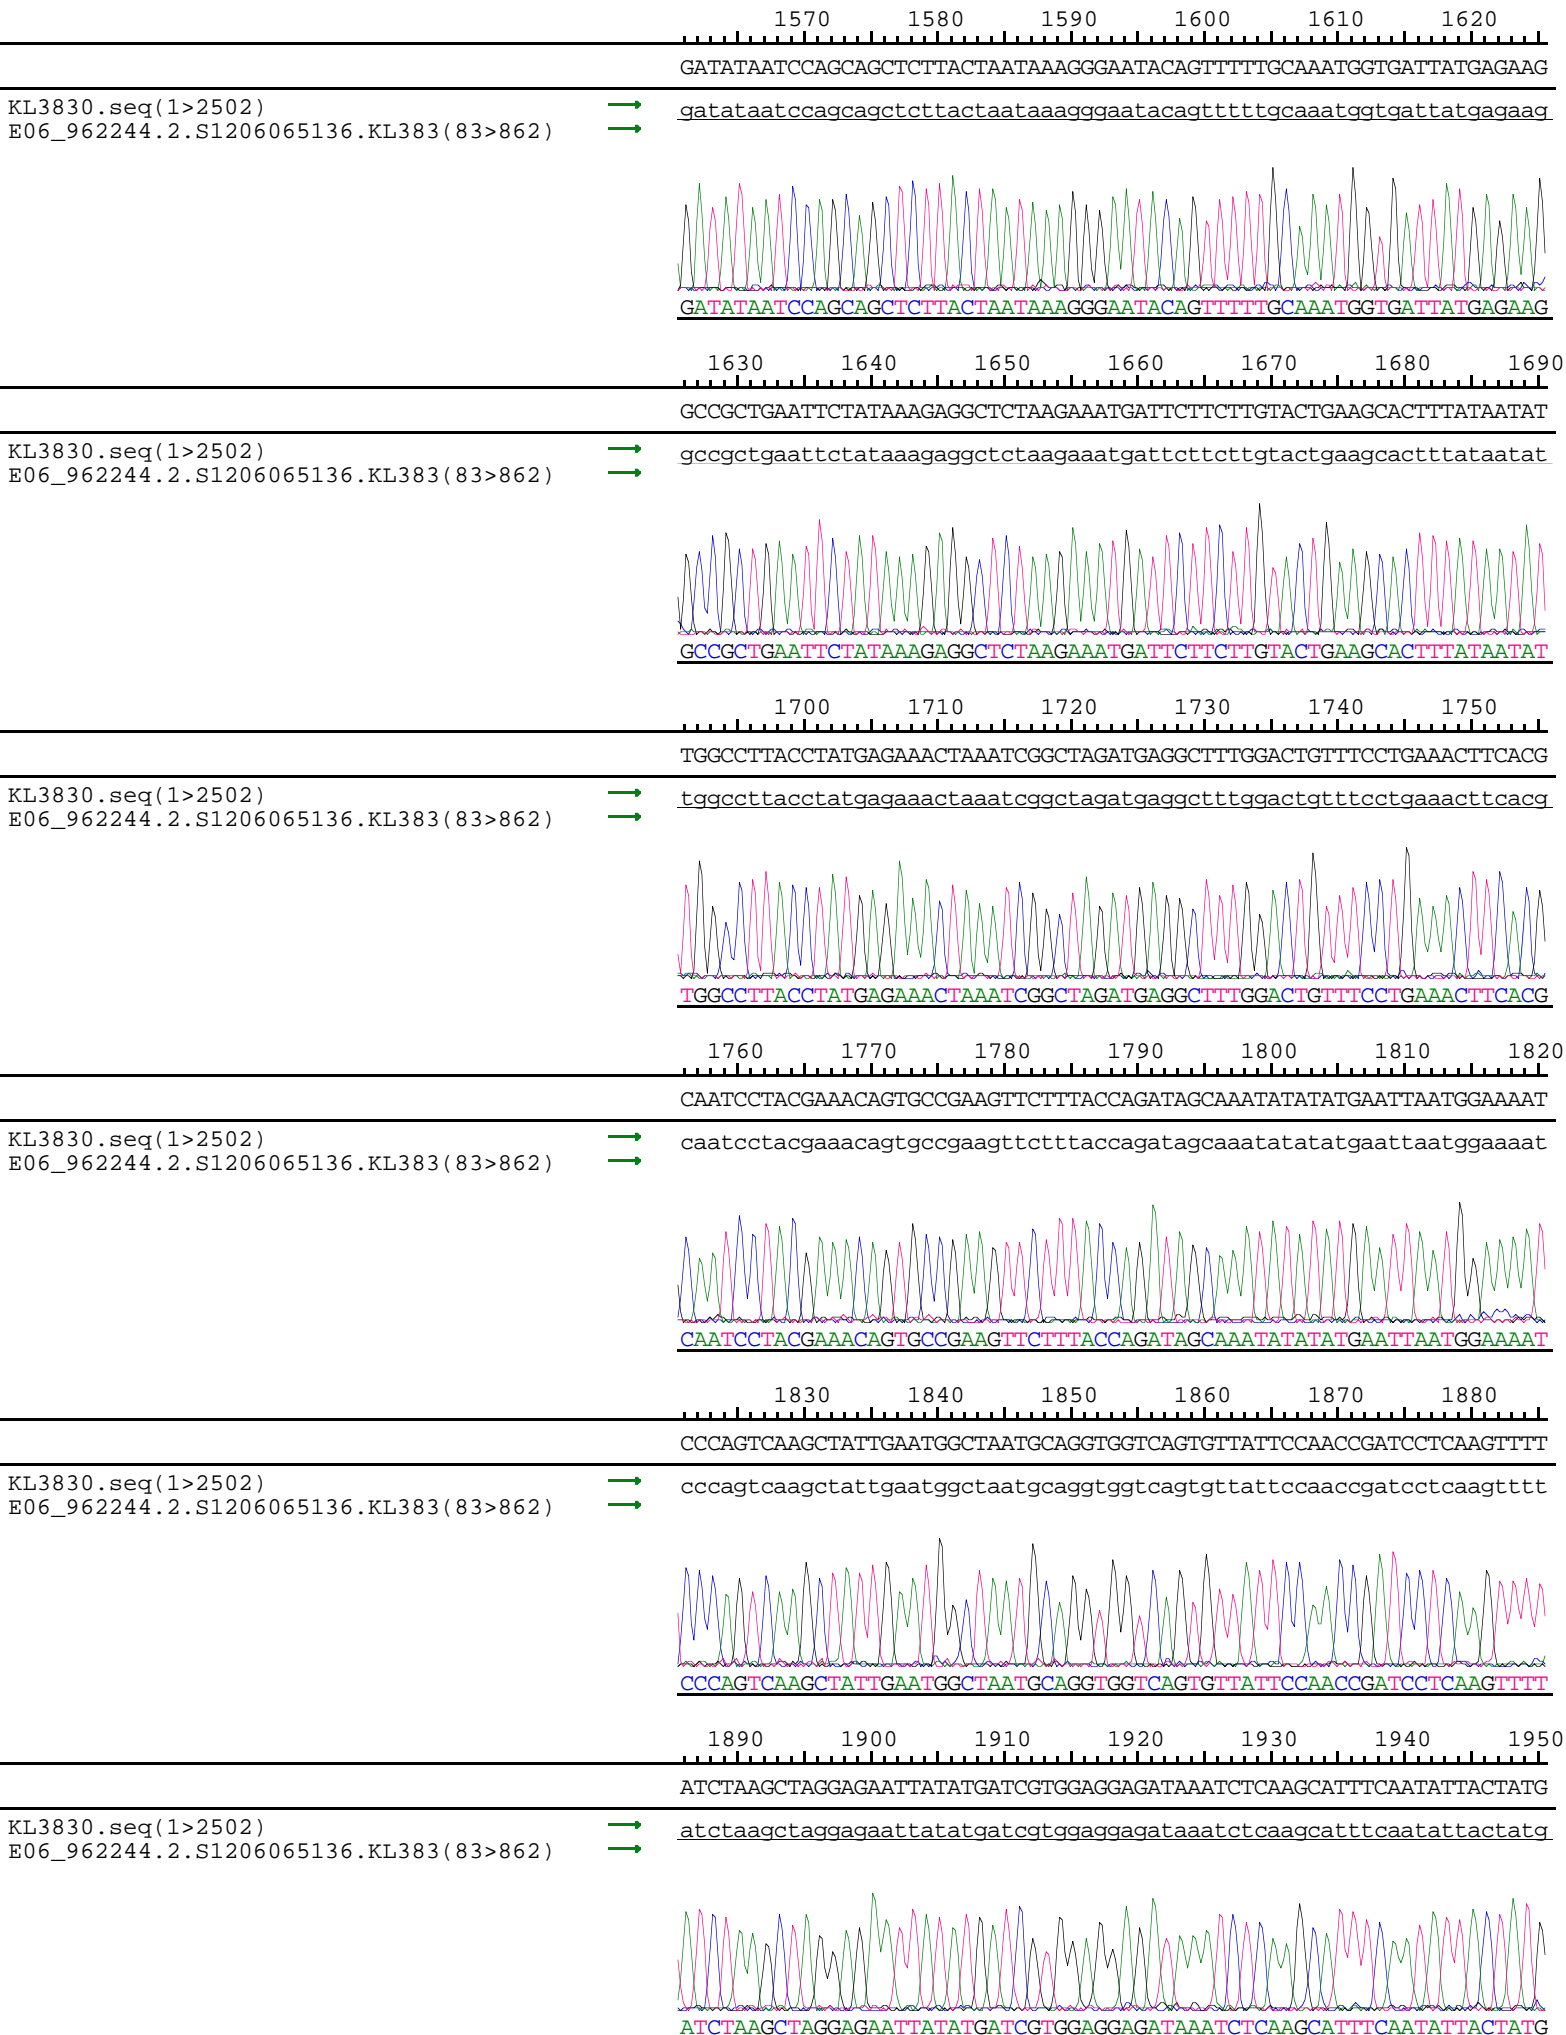

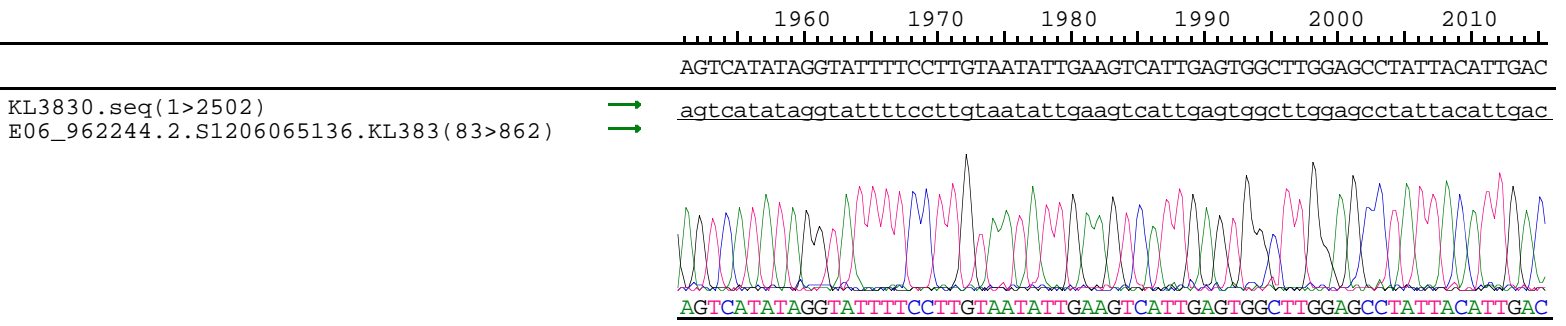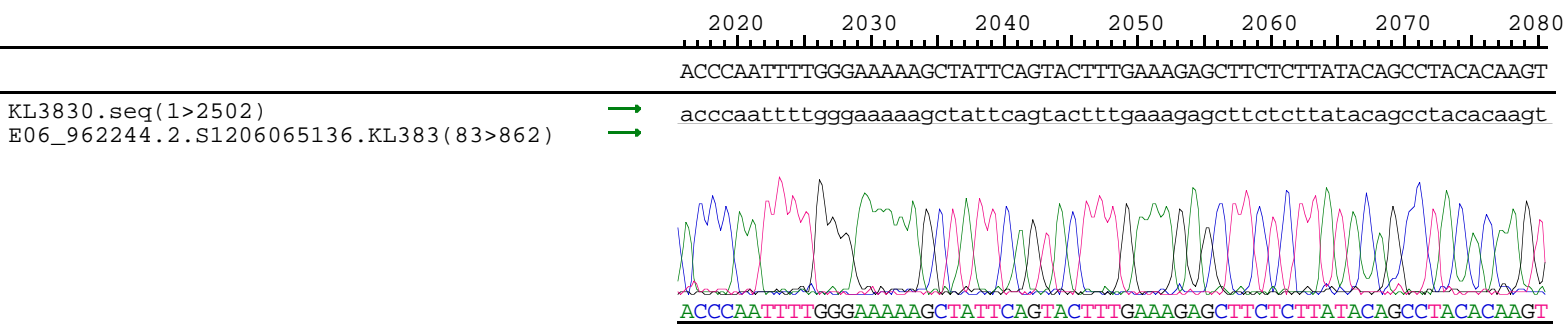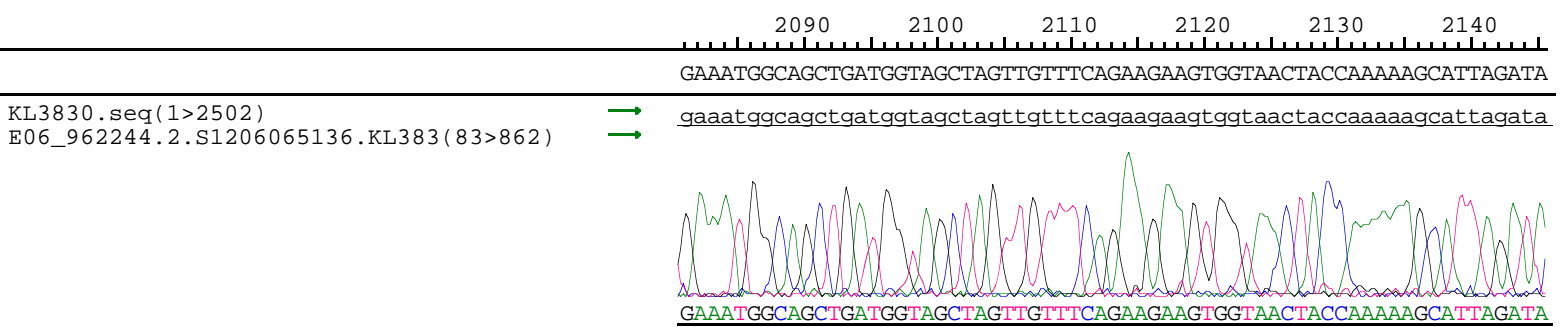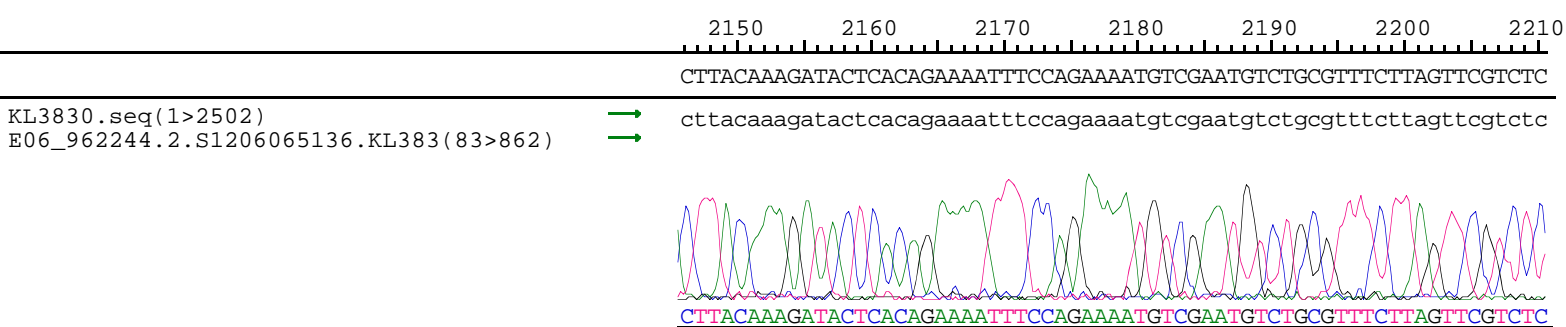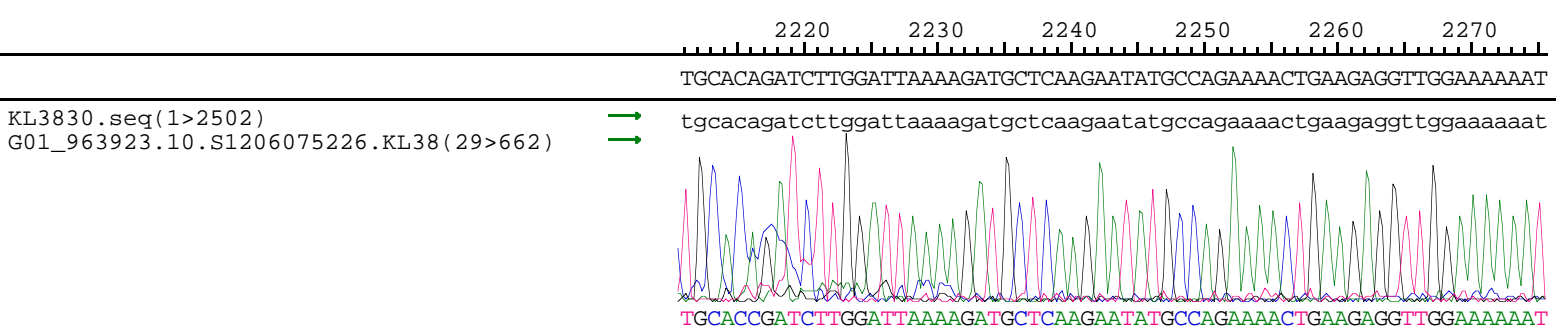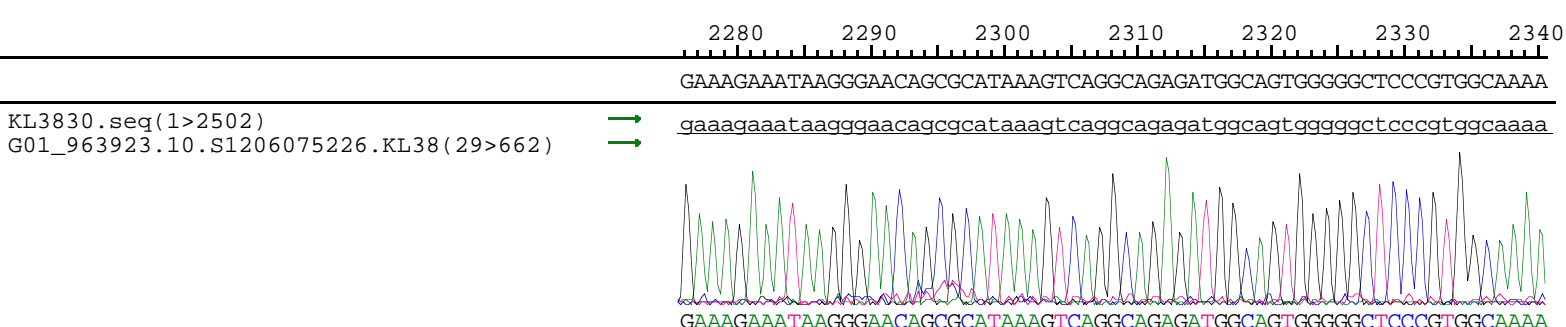

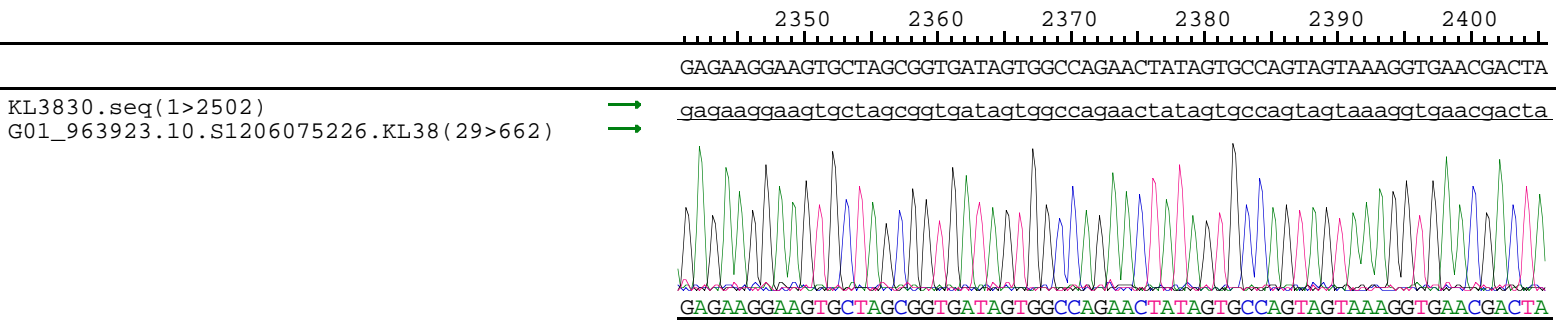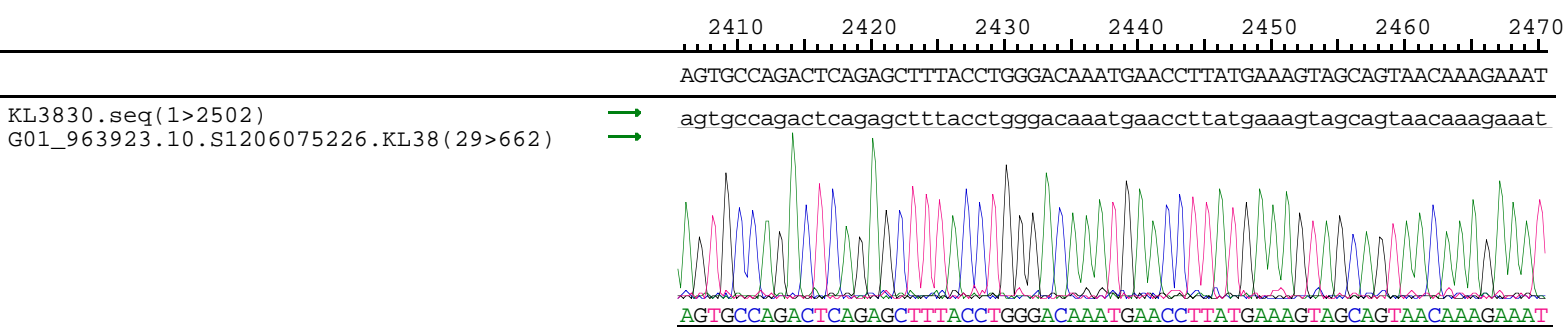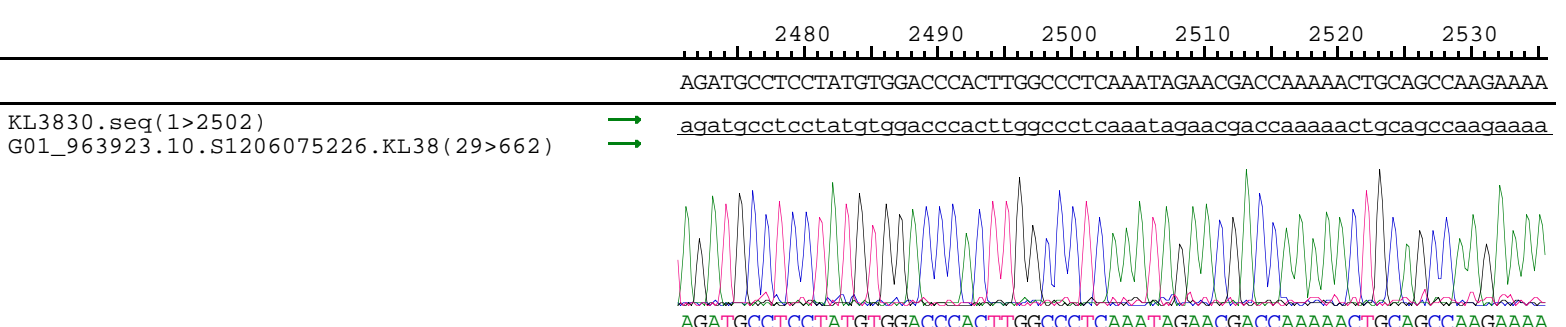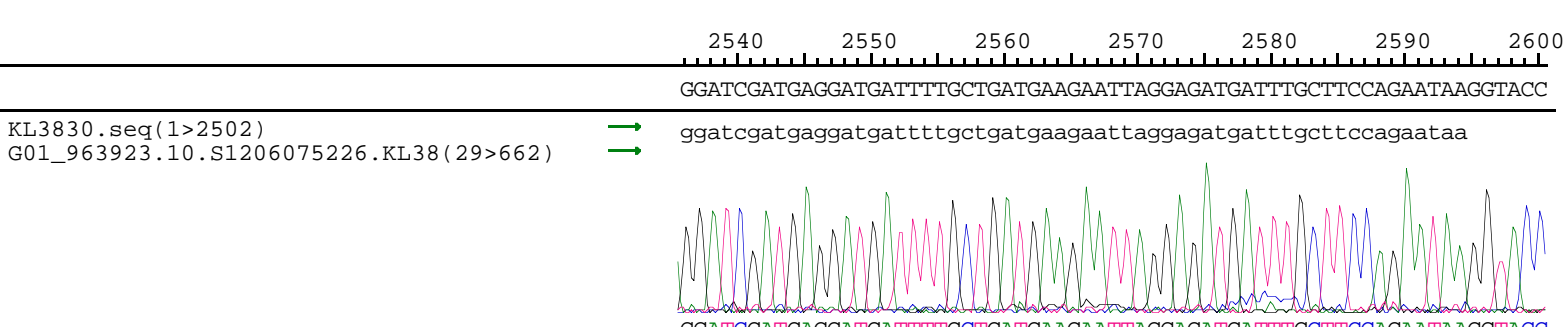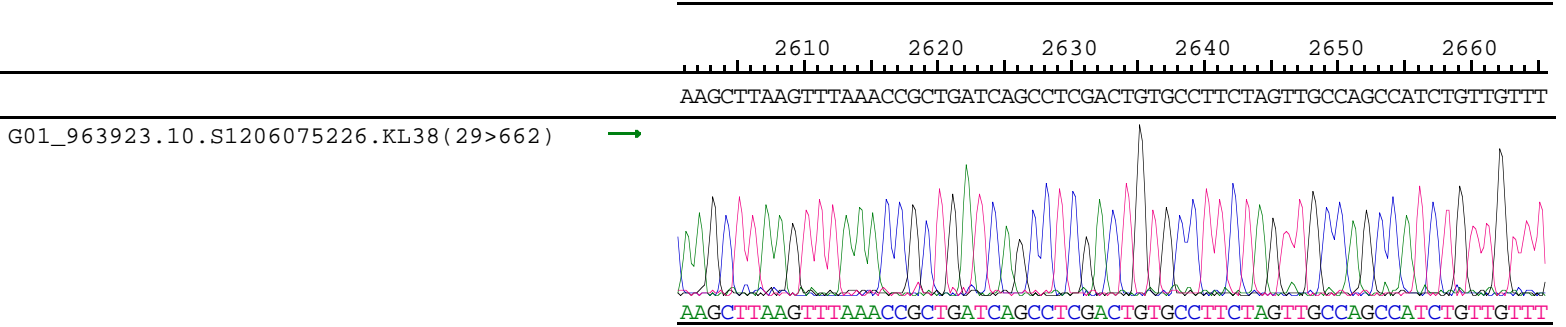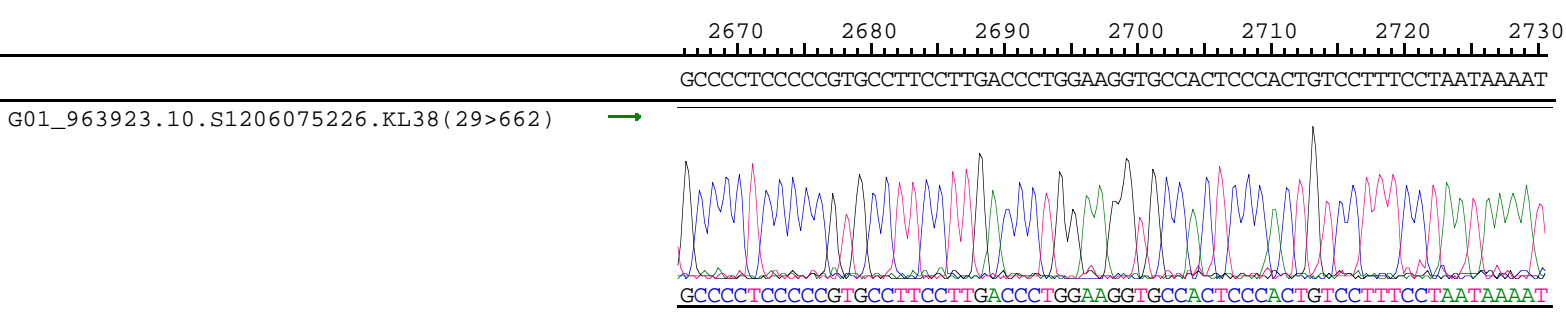

2740 2750 2760 2770 2780 2790

GAGGAAATTCATCGCATTGTCTGAGTAGGTGTCATTCTATTCTGGGGGTGGGGTGGGGCAGGA

G01\_963923.10.S1206075226.KL38(29>662) →

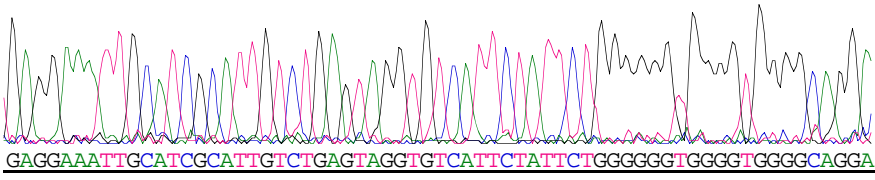

2800 2810 2820 2830 2840

CAGCAAGGGGGAGGATTGGGAAGACAATAGCAGGCATGCTGGGGATGCG

G01\_963923.10.S1206075226.KL38(29>662) →

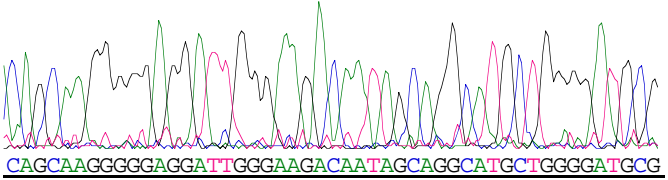

Supplement: 1756-9966-31-75-S2.pdf [file 1756-9966-31-75-S2.pdf]
